# Supplementary figures and images for: AtSK11 and AtSK12 Mediate the Mild Osmotic Stress-Induced Root Growth Response in Arabidopsis
Source: MDPI journal article supplement (doi:10.3390/ijms21113991), 2020-06-02

**A**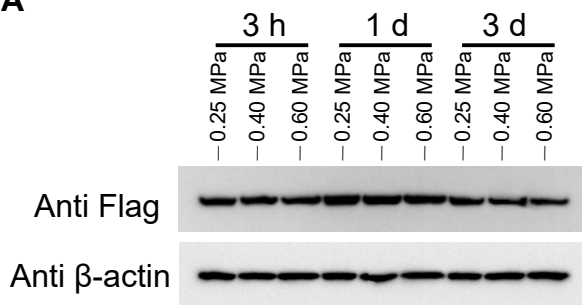**B**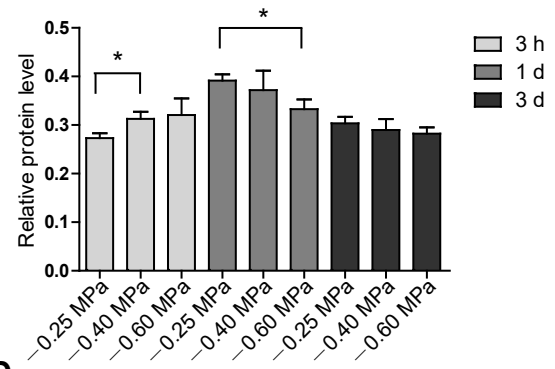**C**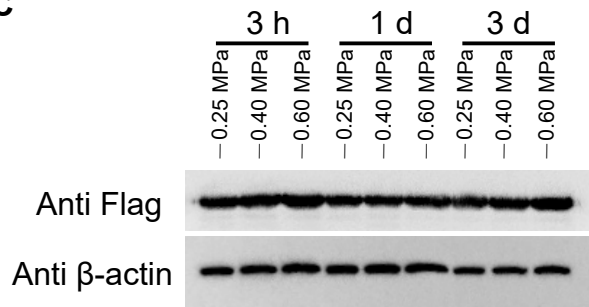**D**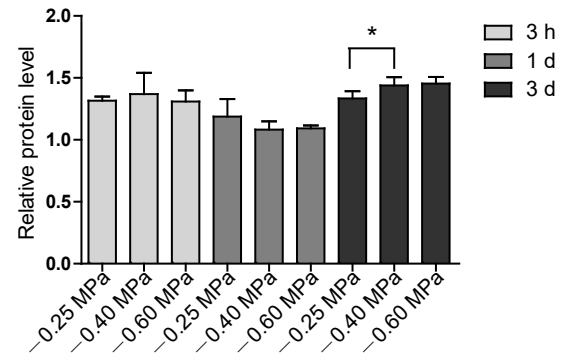

Supplement: s1 [file s1]

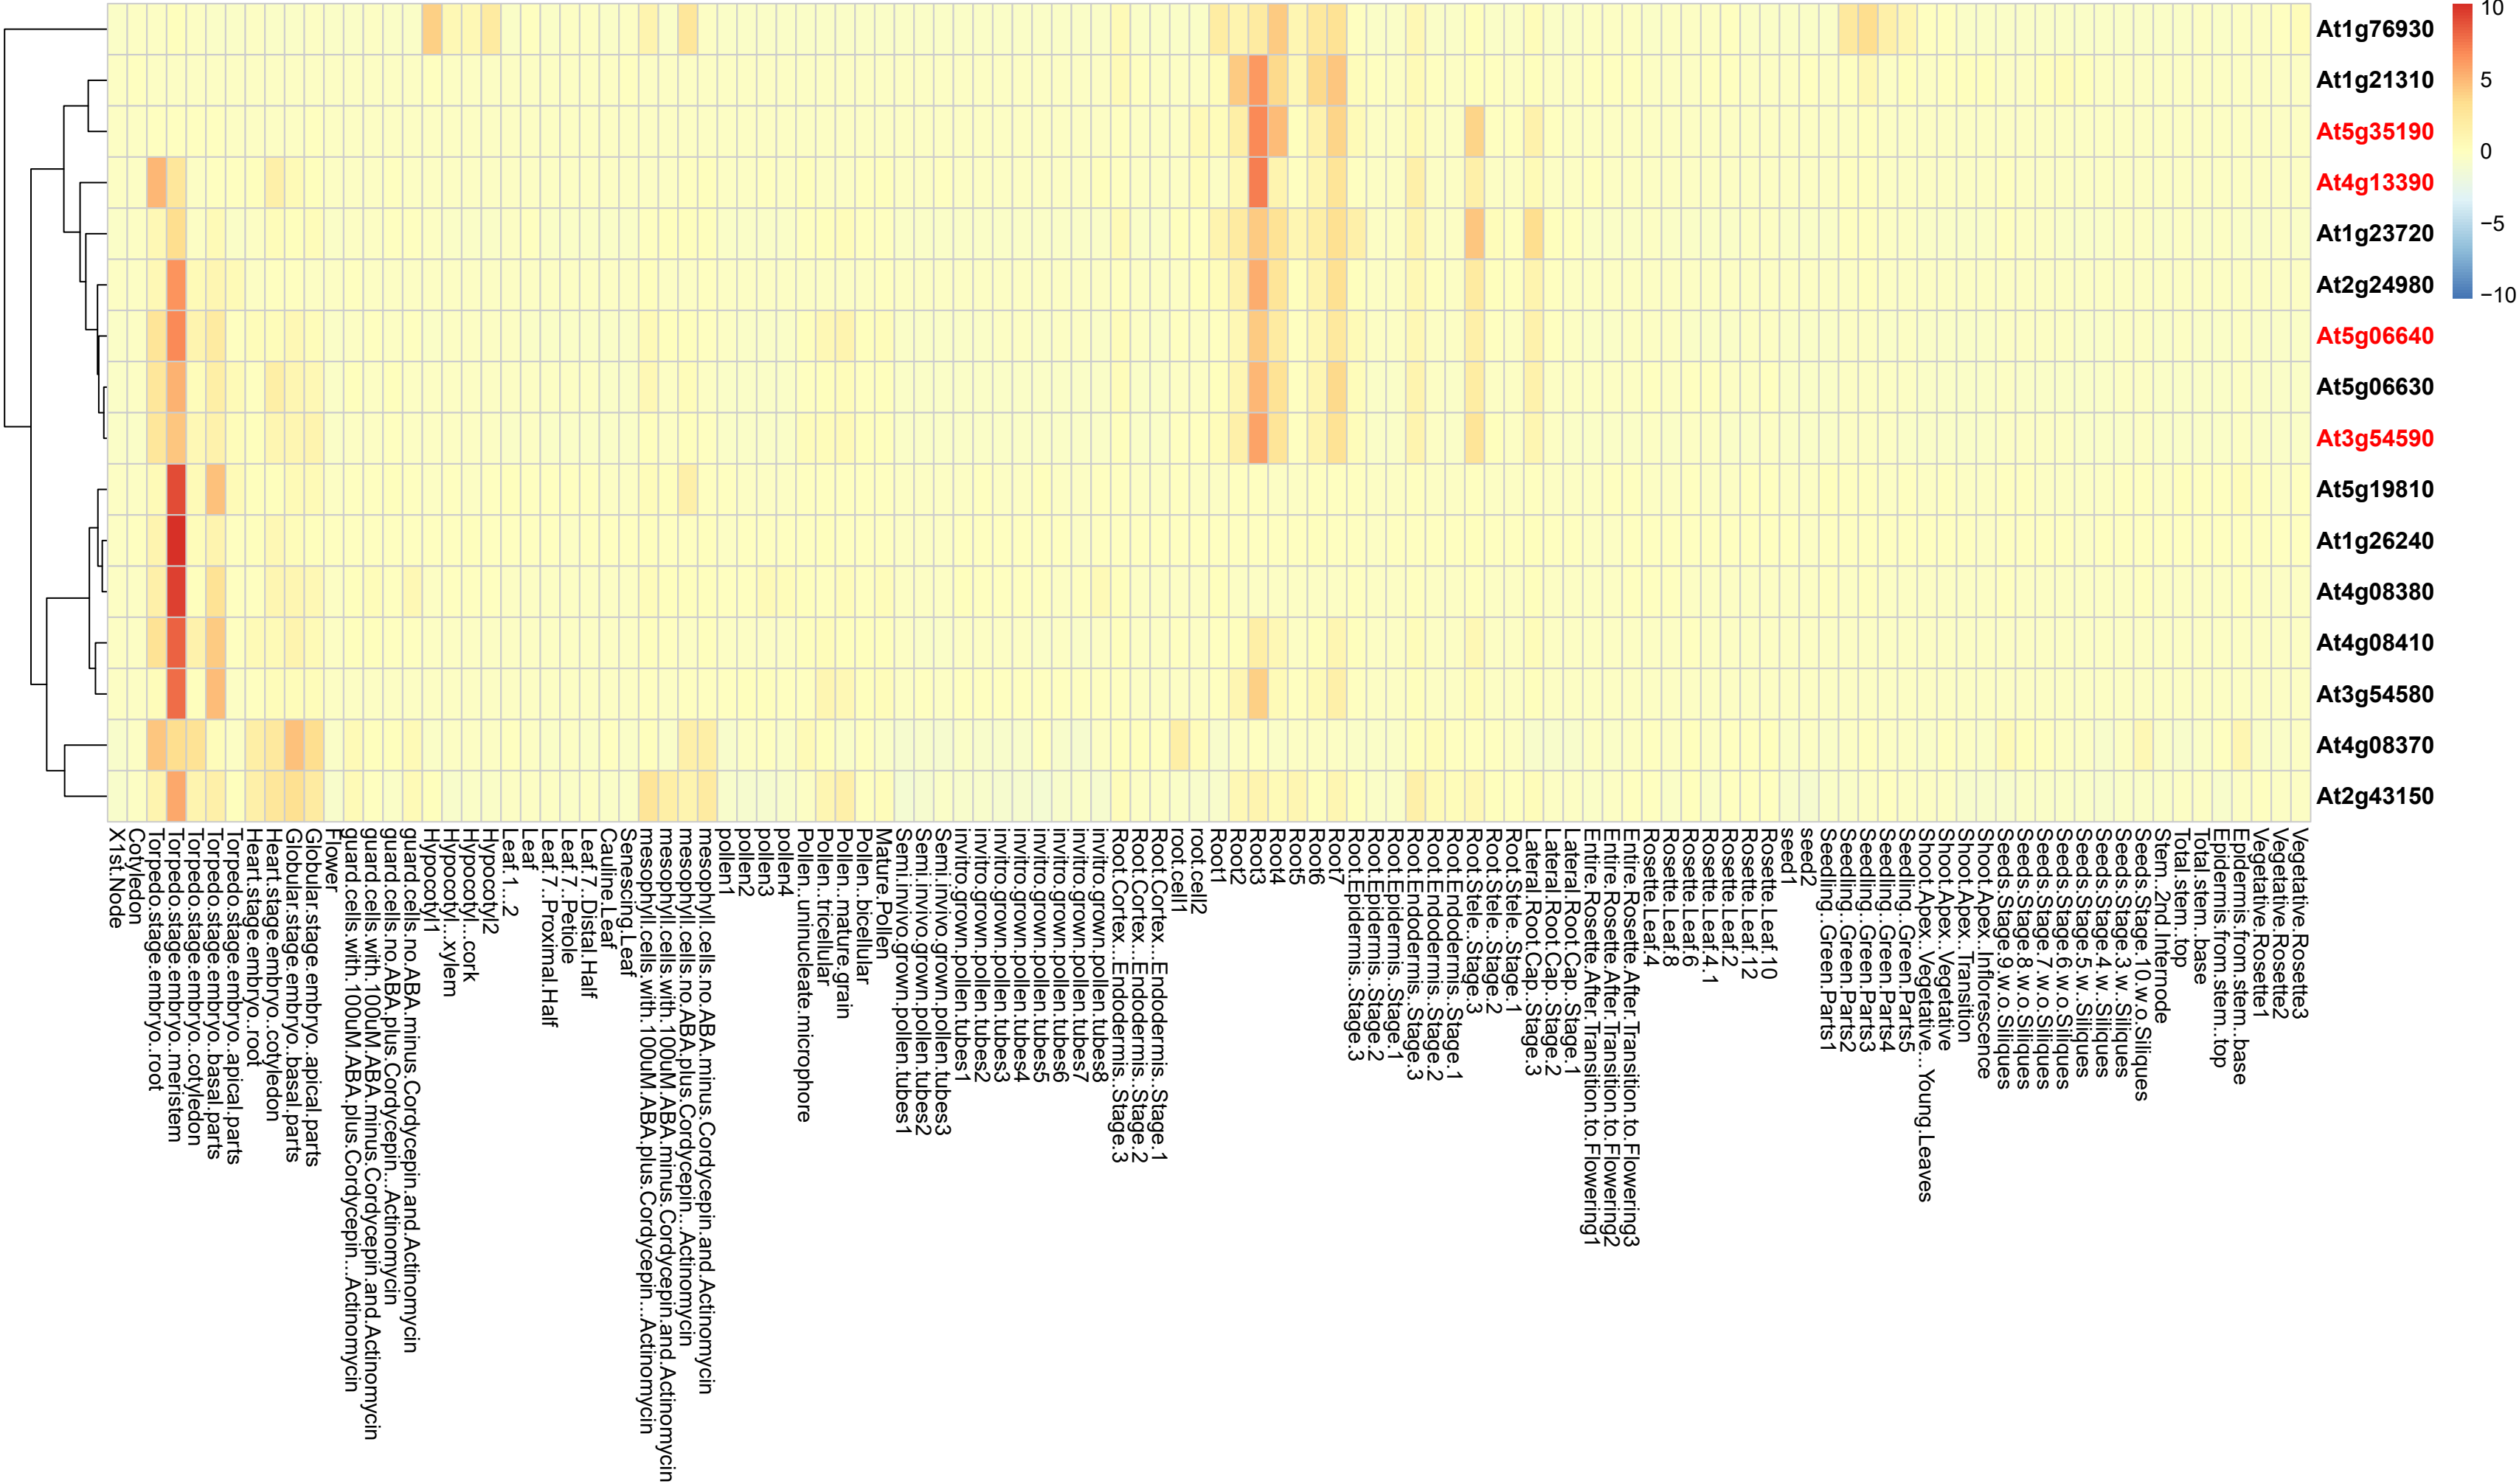

Supplement: s1 [file s1]

**A**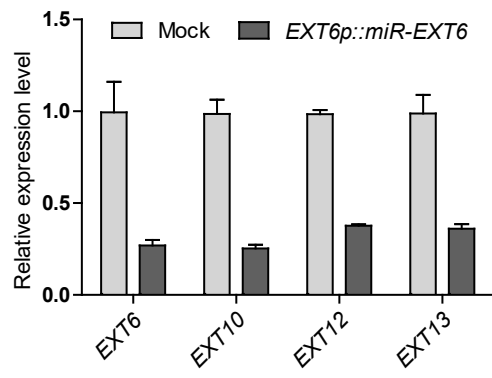**B**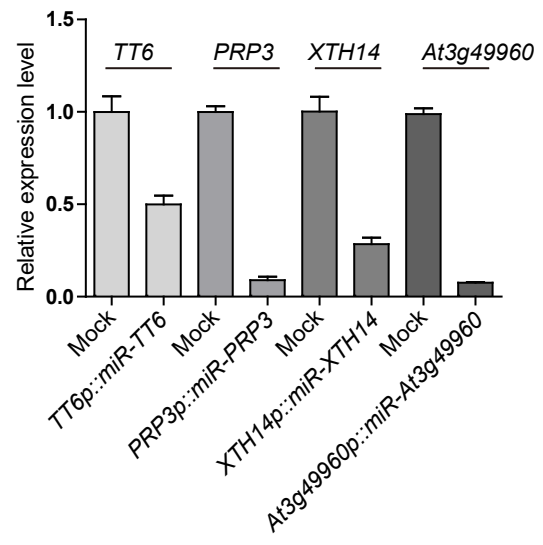

Supplement: s1 [file s1]

**A**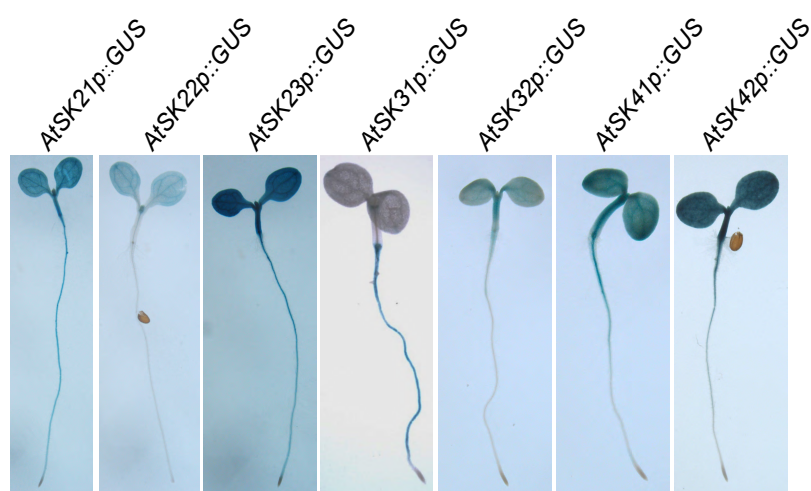**B***gAtSK12-GFP*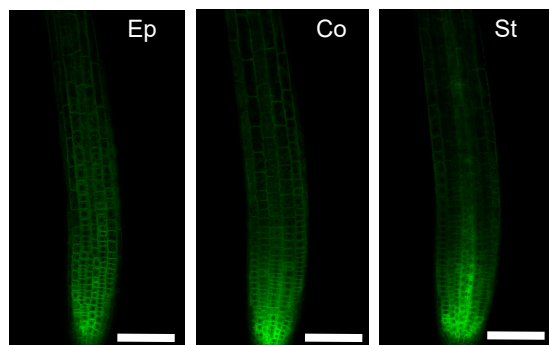**C***gAtSK13-GFP*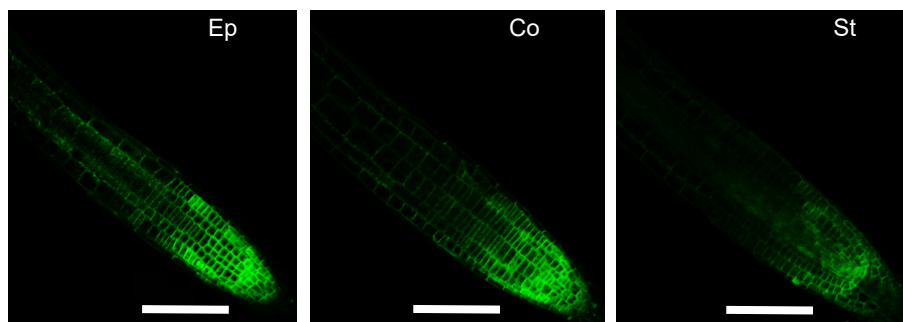

Supplement: s1 [file s1]

**A**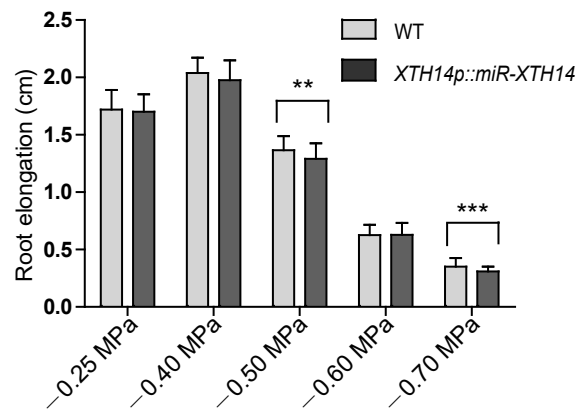**B**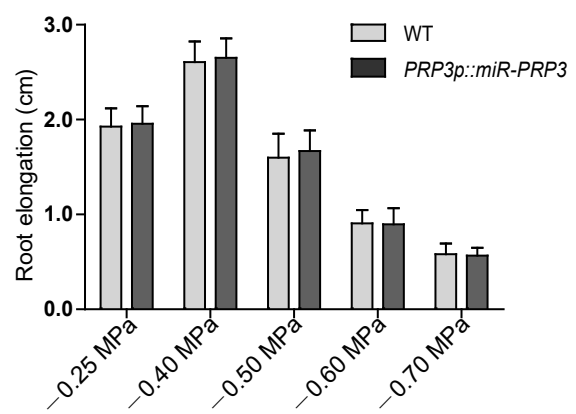**C**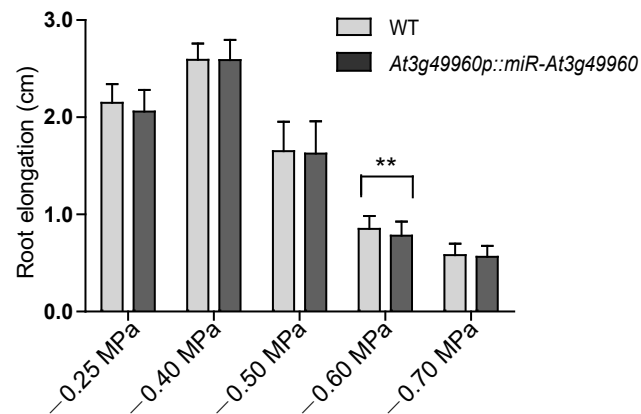

Supplement: s1 [file s1]

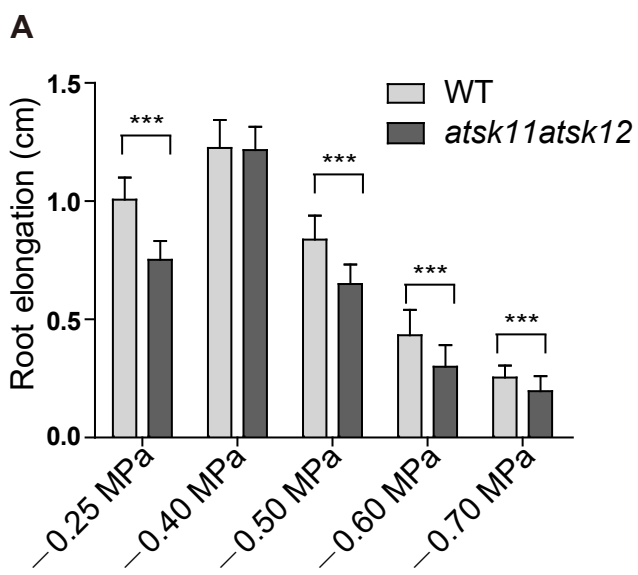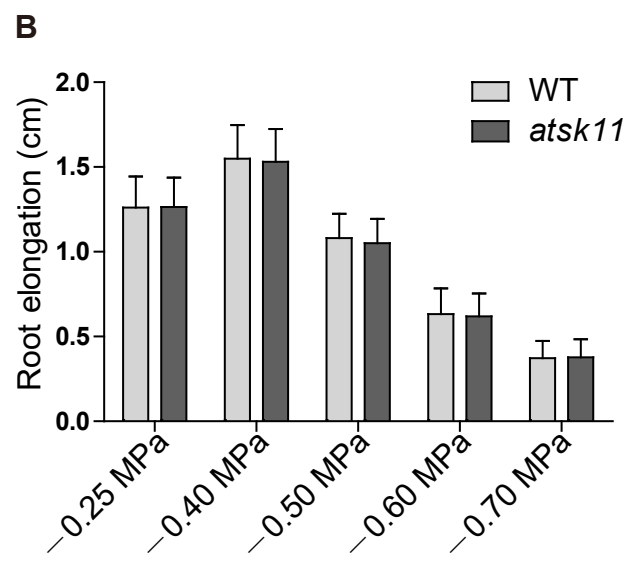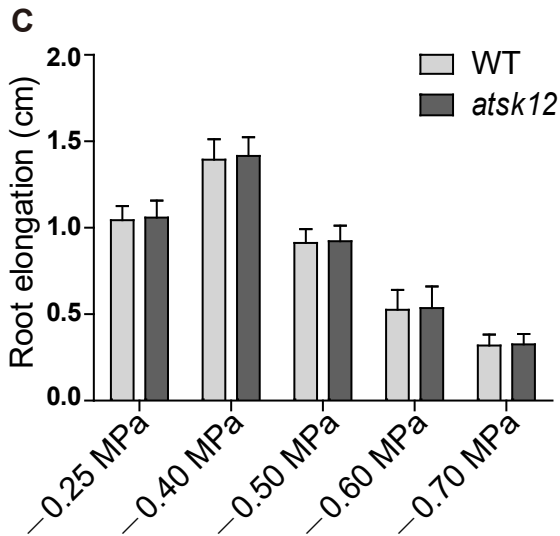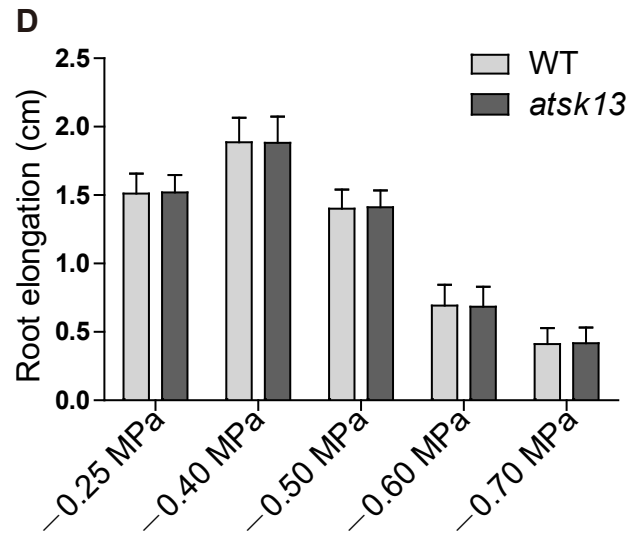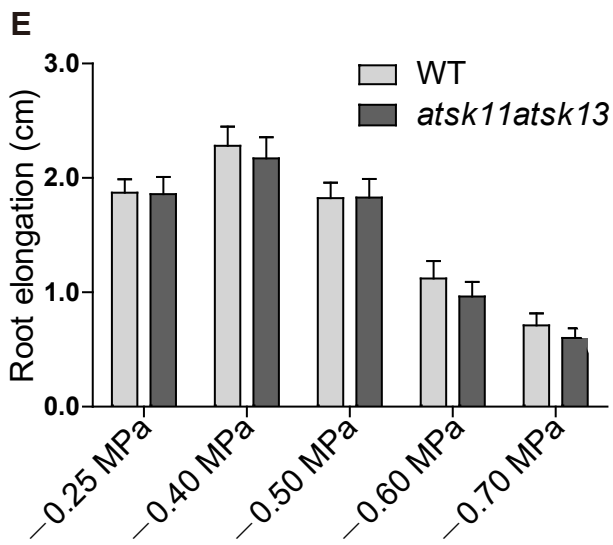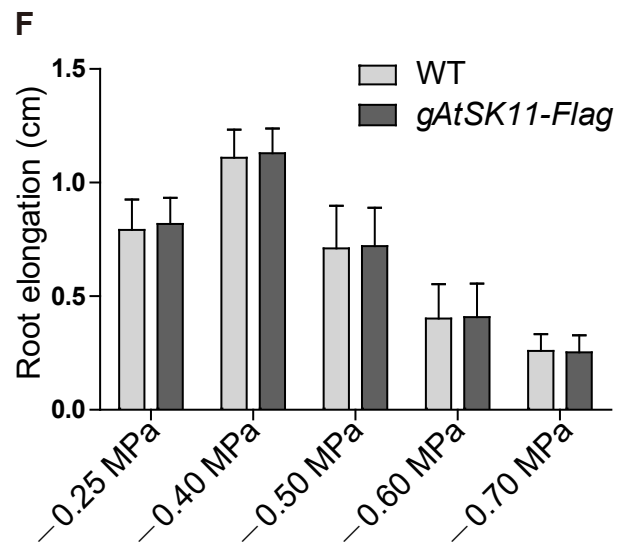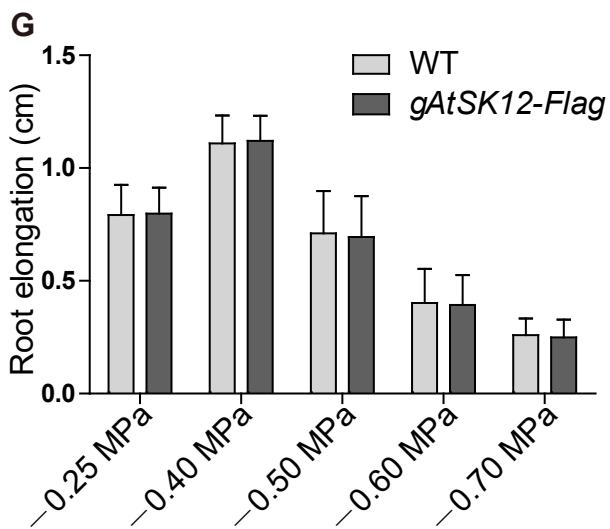

Supplement: s1 [file s1]

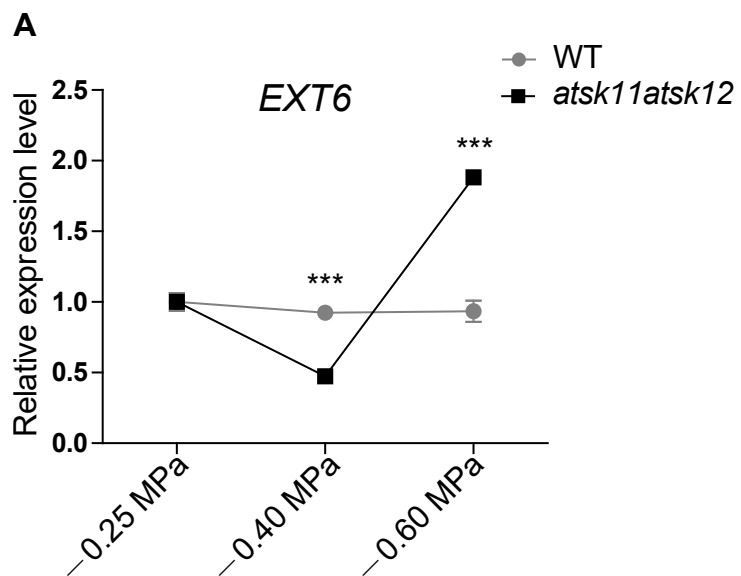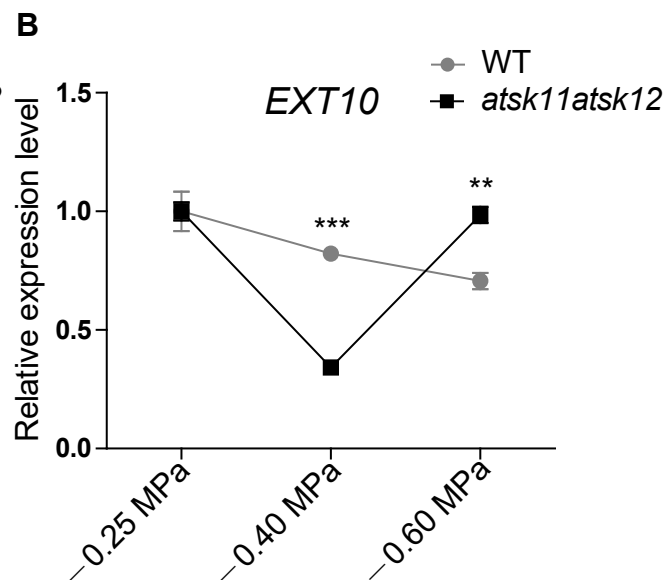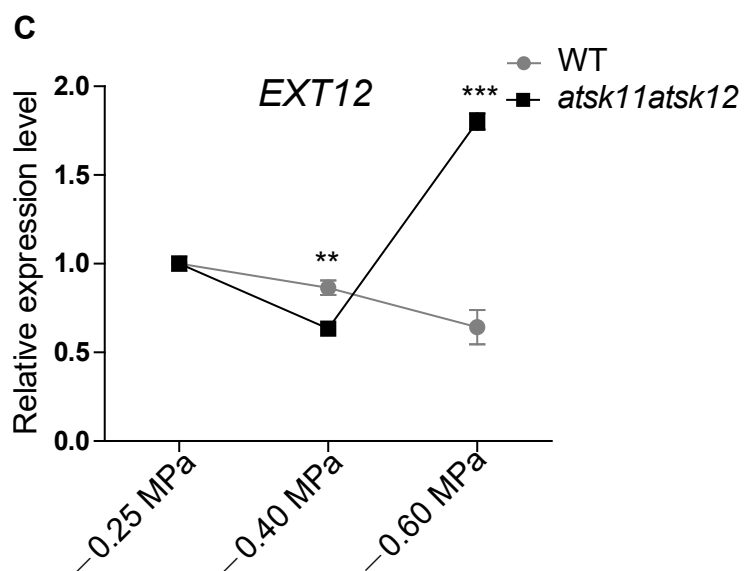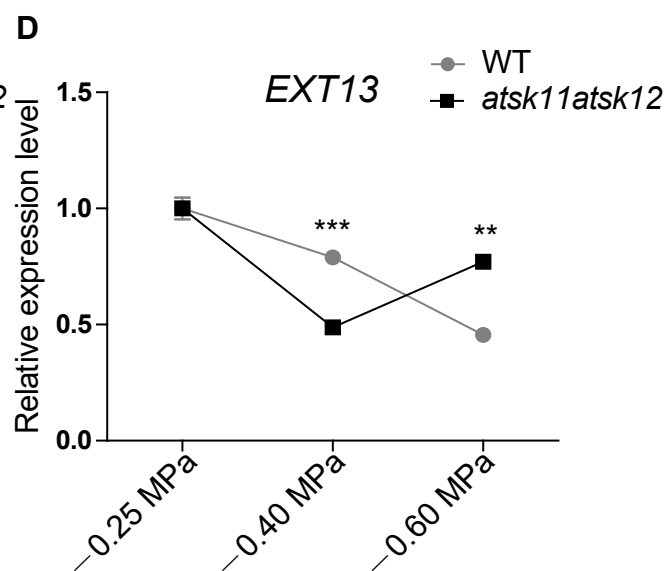

Supplement: s1 [file s1]

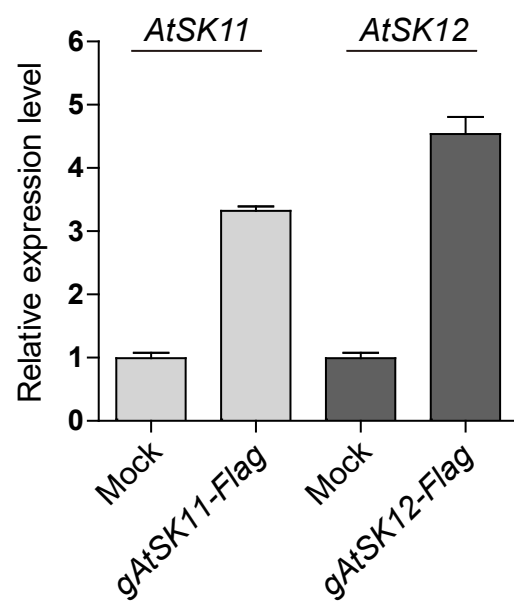

Supplement: s1 [file s1]
